# Supplementary material
Source: Springer Nature journal article supplement (https://www.springermedizin.de/resource/supplementary/12943_2014_1354_MOESM2_ESM.pdf/9552792)

**A****Caki<sup>par</sup>**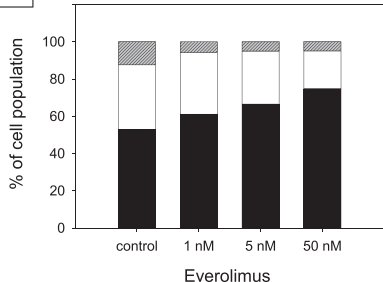**B****Caki<sup>res</sup>**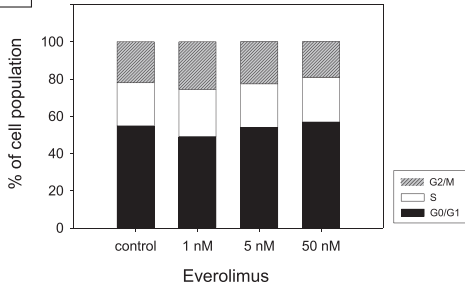

Supplement: MOESM2 [file 9552792]
